# Supplementary material for: Synthesis of Altissimacoumarin D and Other Prenylated Coumarins and Their Ability to Reverse the Multidrug Resistance Phenotype in Candida albicans
Source: MDPI journal article supplement (doi:10.3390/jof9070758), 2023-07-18
Supplement: s1 [file s1]

**Synthesis of altissimacoumarin D and other prenylated coumarins and  
their ability to reverse the multidrug resistance phenotype in *Candida  
albicans***

**Supplementary information**

<sup>1</sup>H and <sup>13</sup>C NMR spectra

Figure S1. <sup>1</sup>H NMR spectra of ACS51.

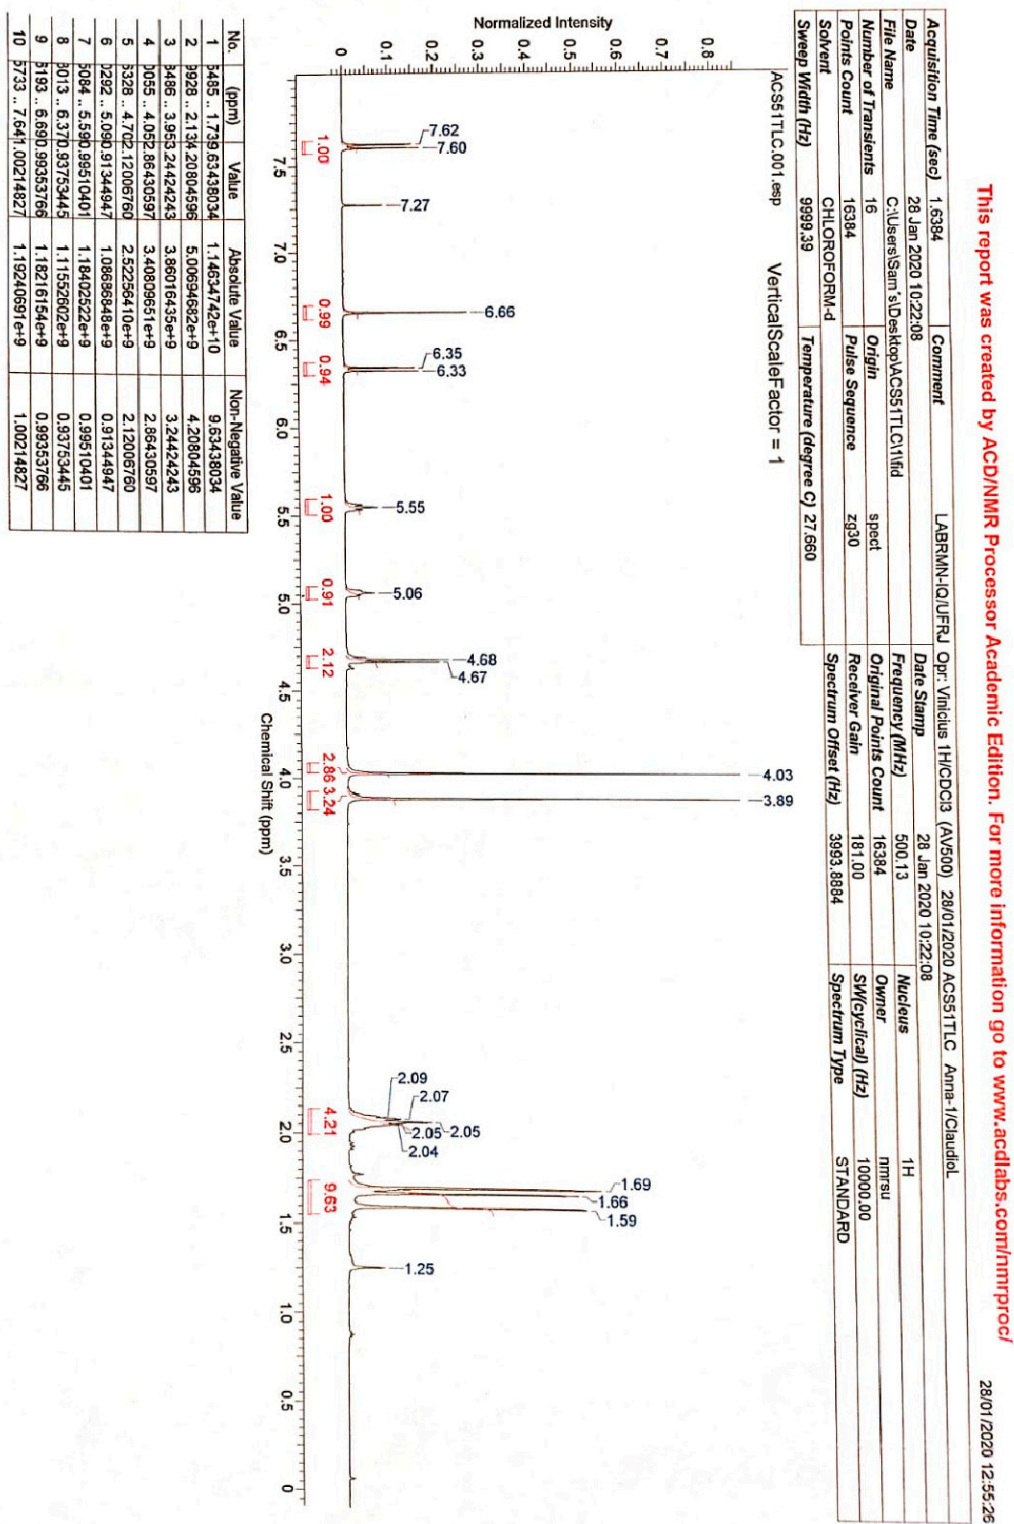

Figure S2.  $^{13}\text{C}$  NMR spectra of ACS51.

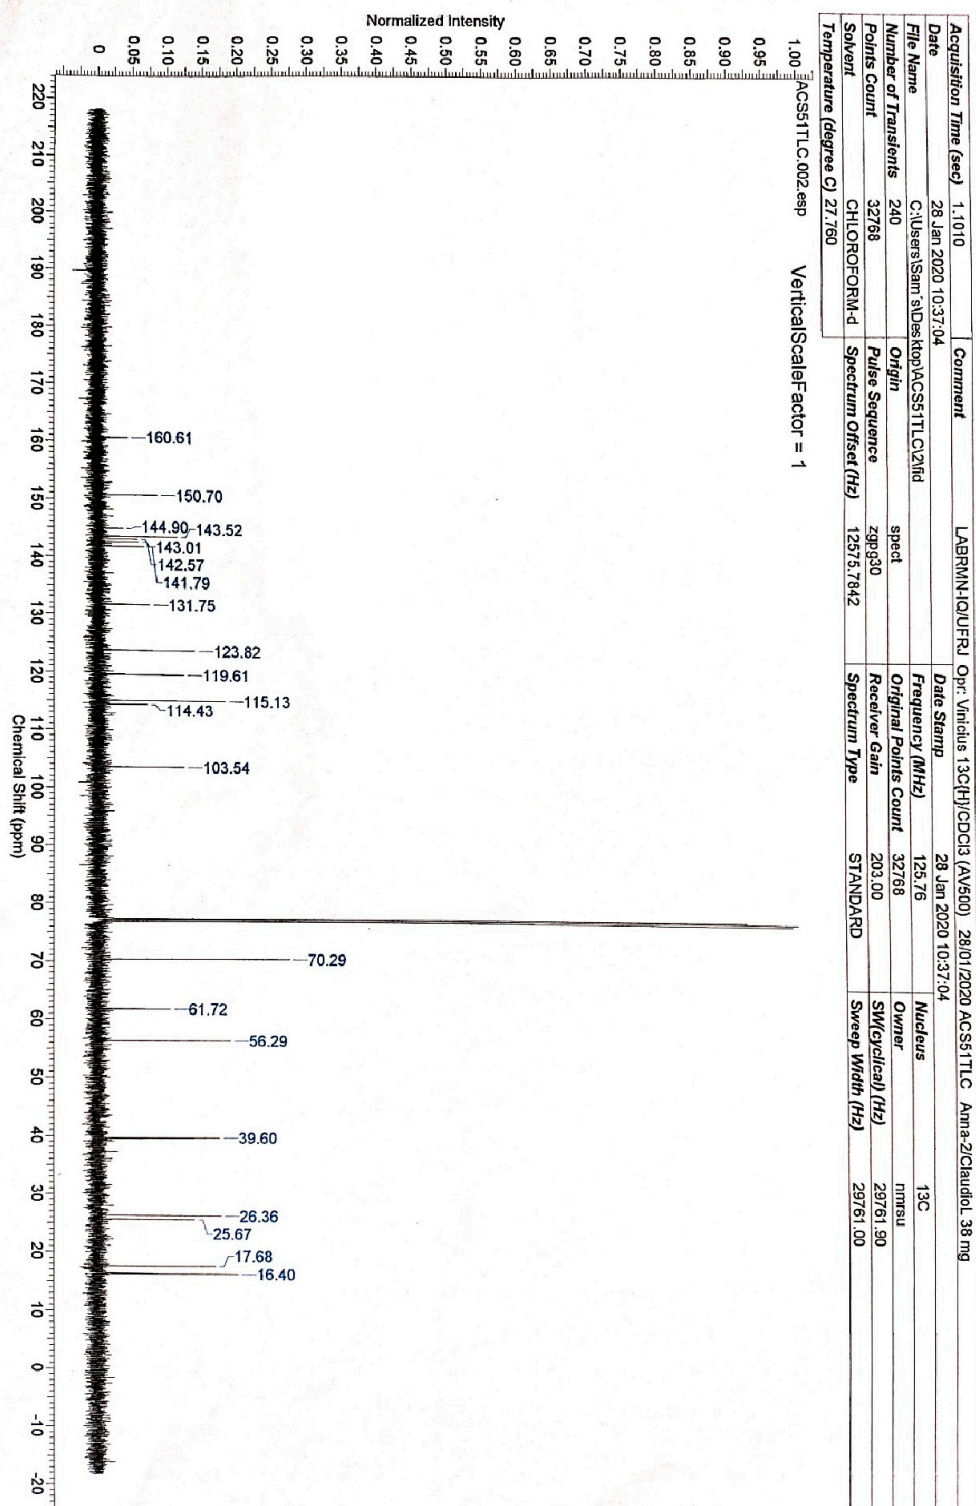

Figure S3.  $^1\text{H}$  NMR spectra of ACS50.

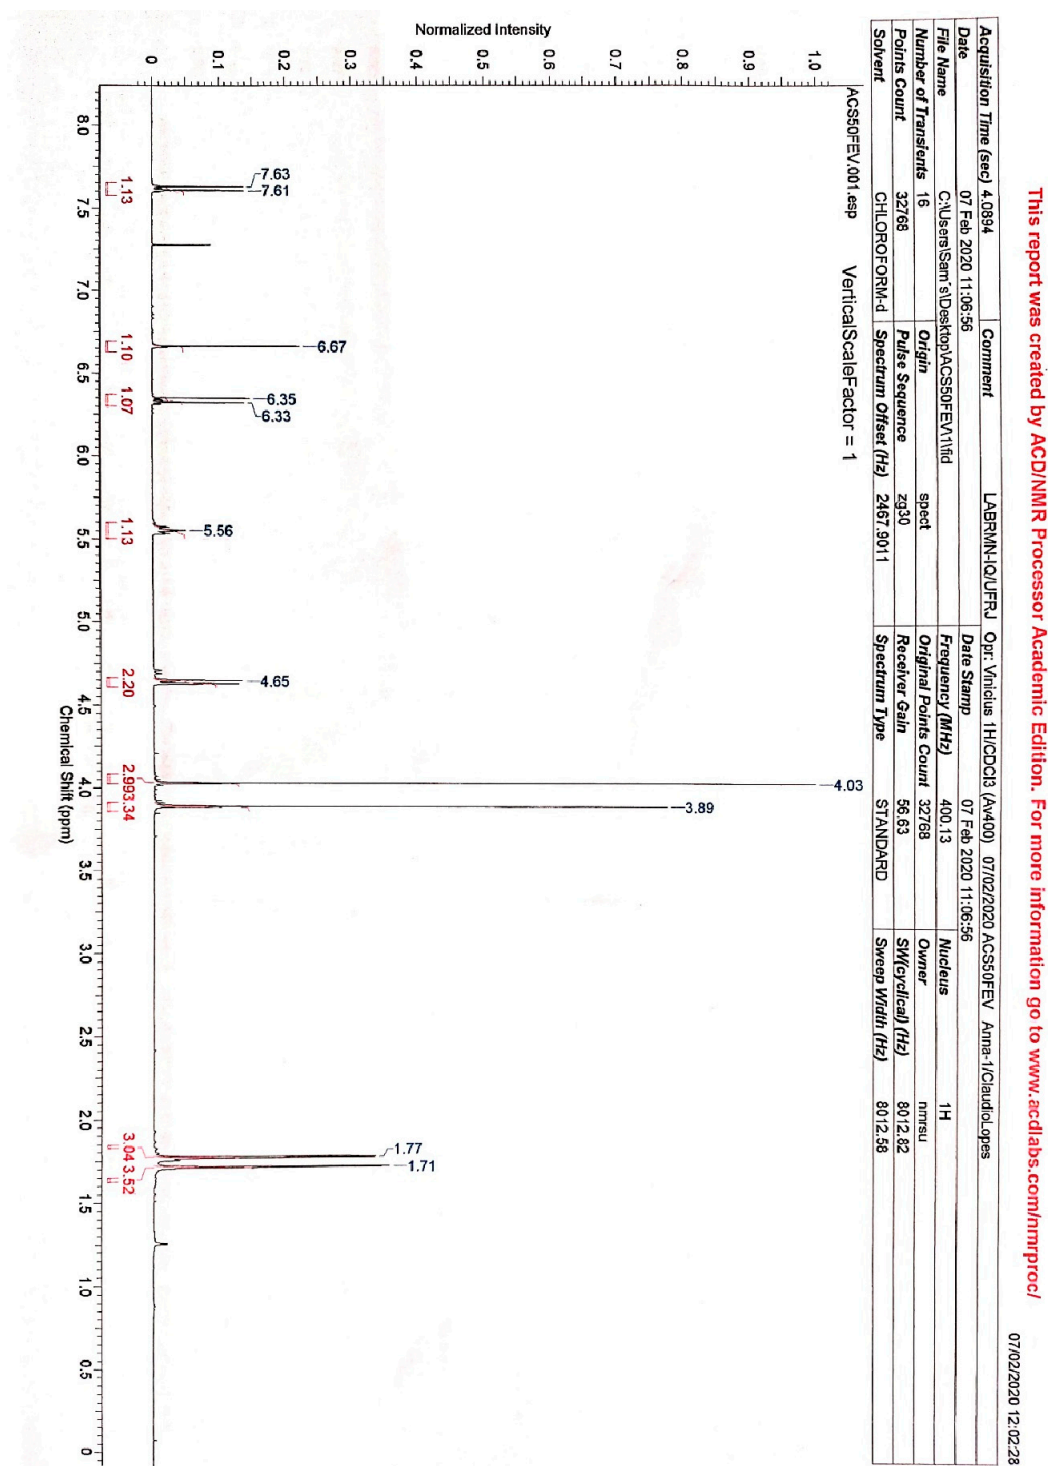

Figure S4.  $^{13}\text{C}$  NMR spectra of ACS50.

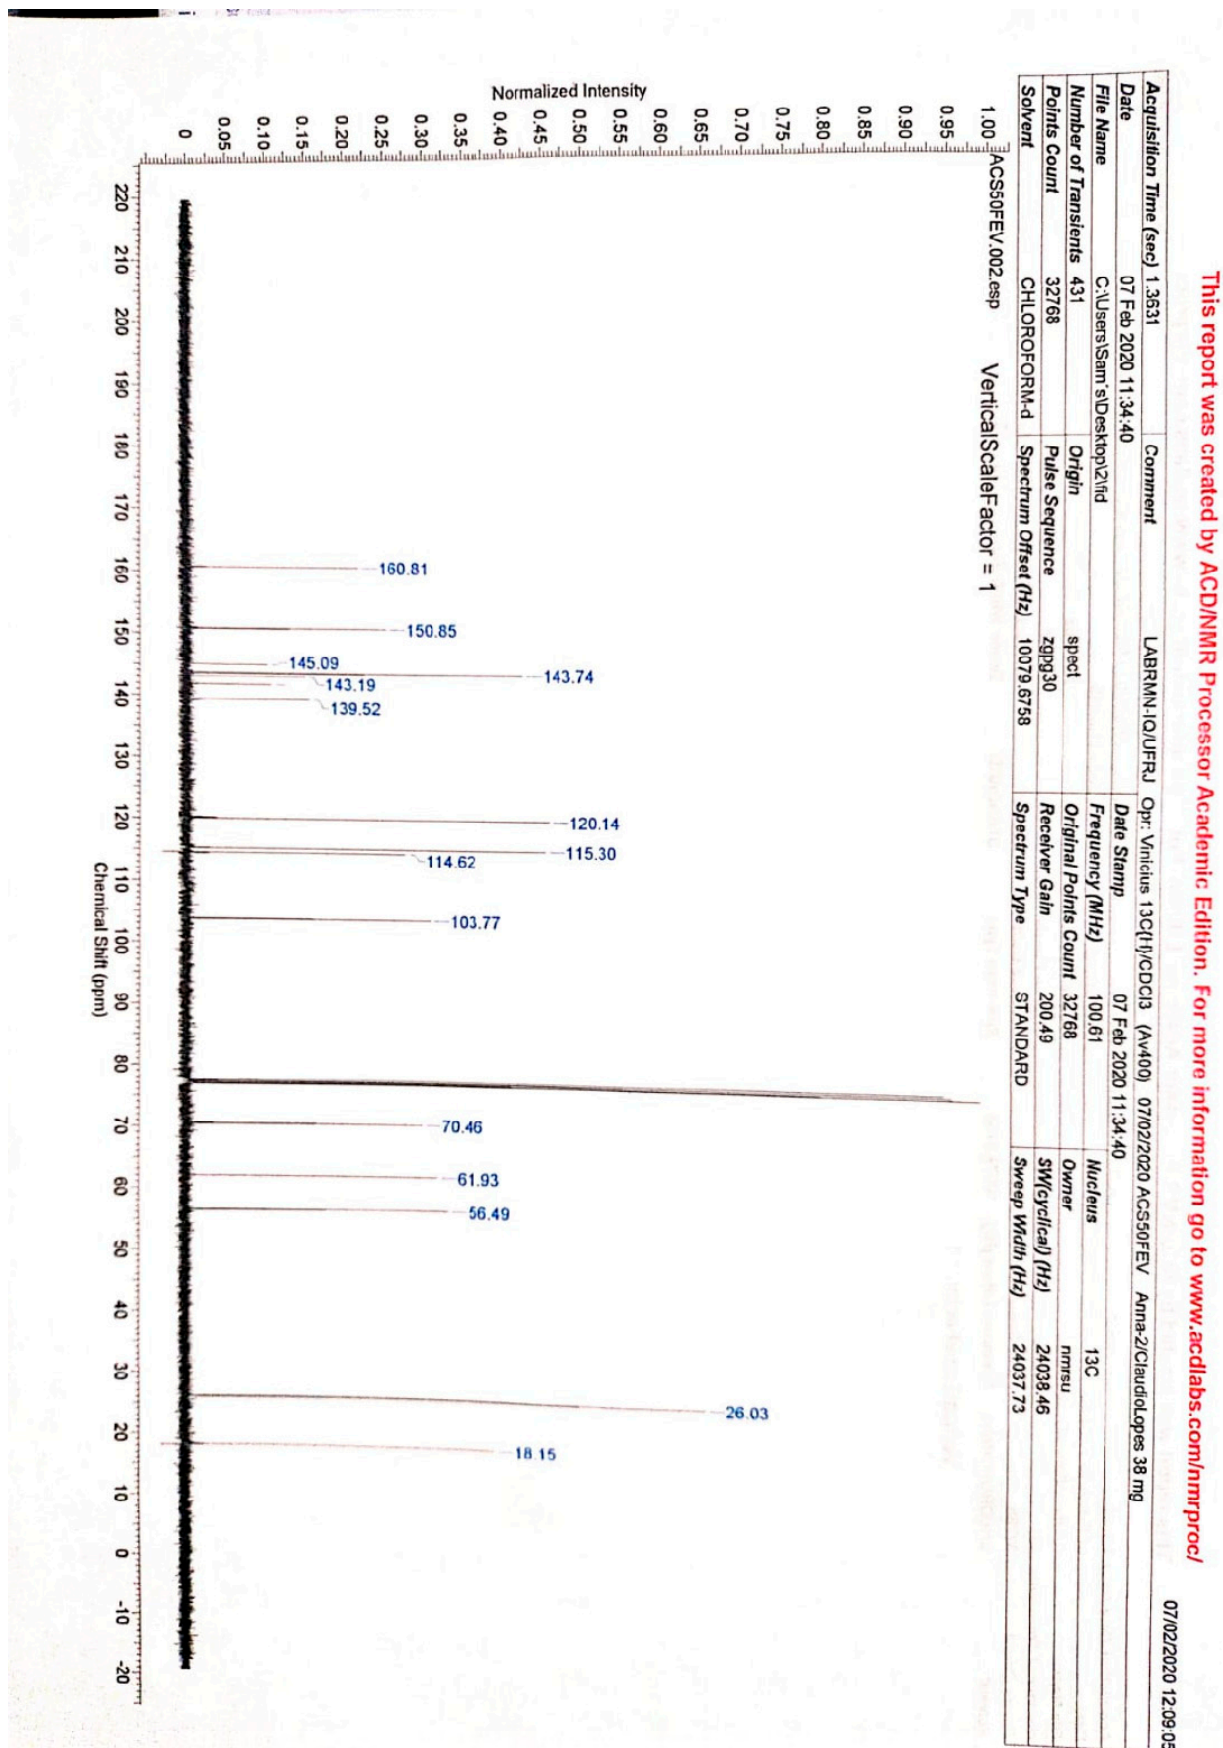



Figure S5.  $^1\text{H}$  NMR spectra of ACS48.

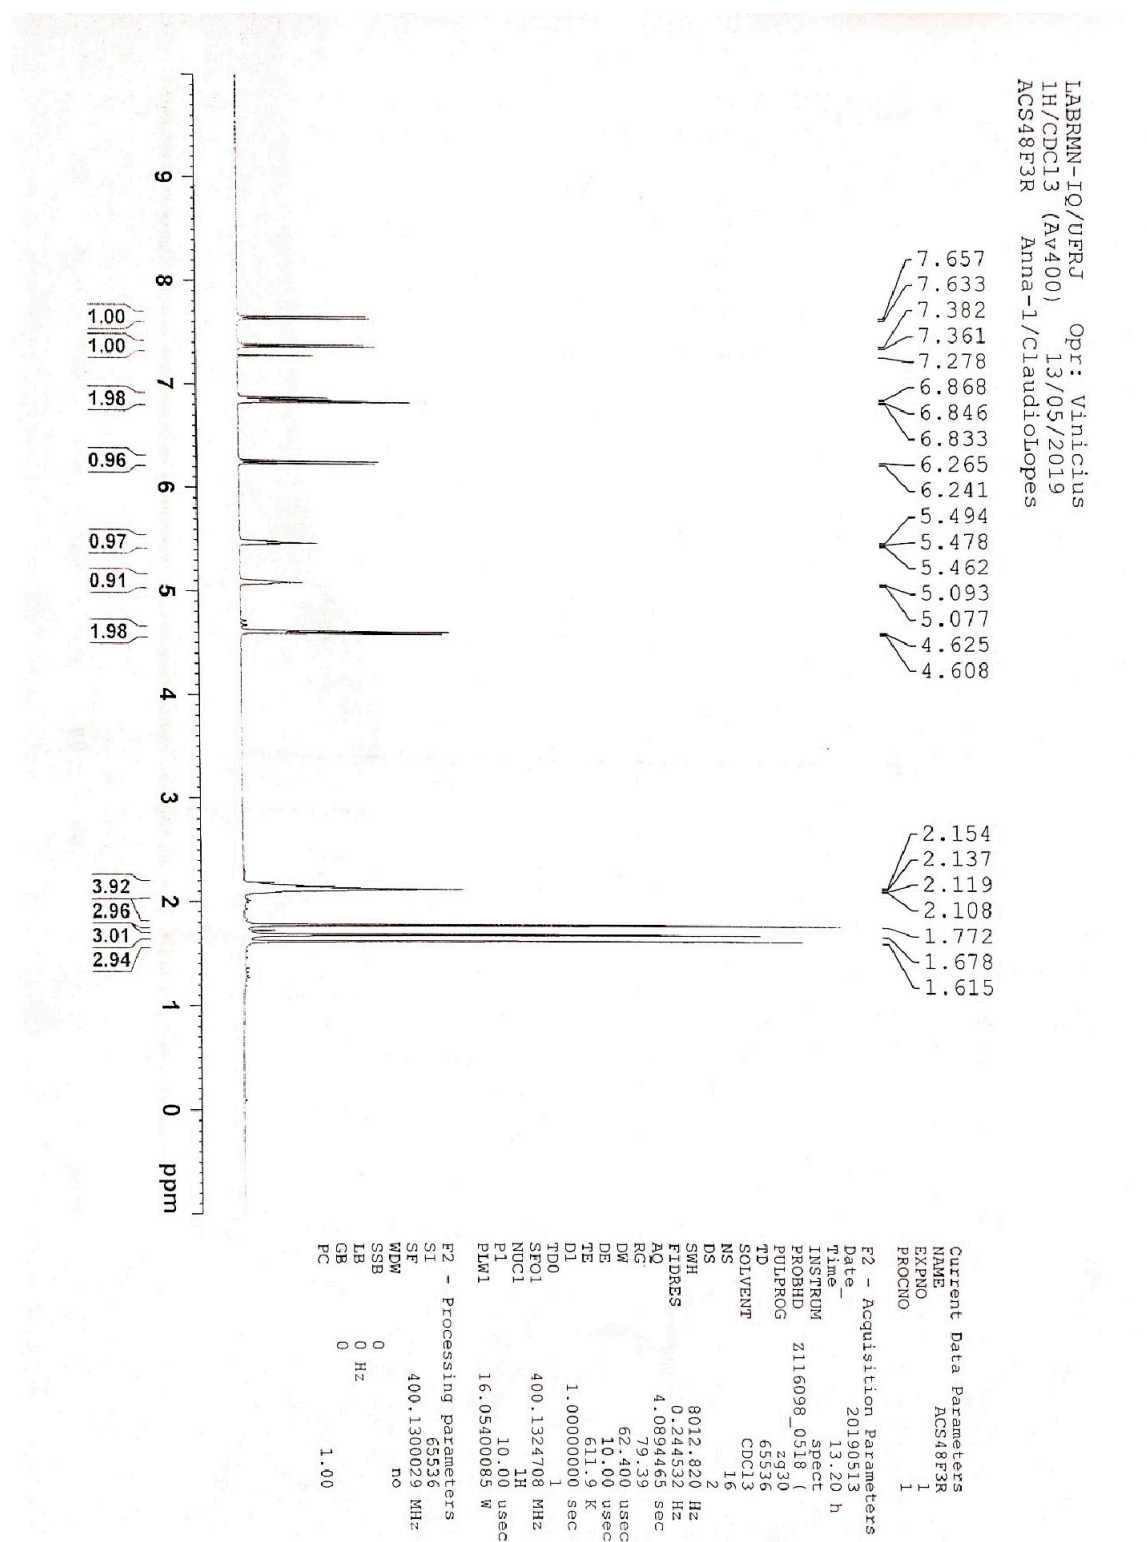

Figure S6.  $^{13}\text{C}$  NMR spectra of ACS48.

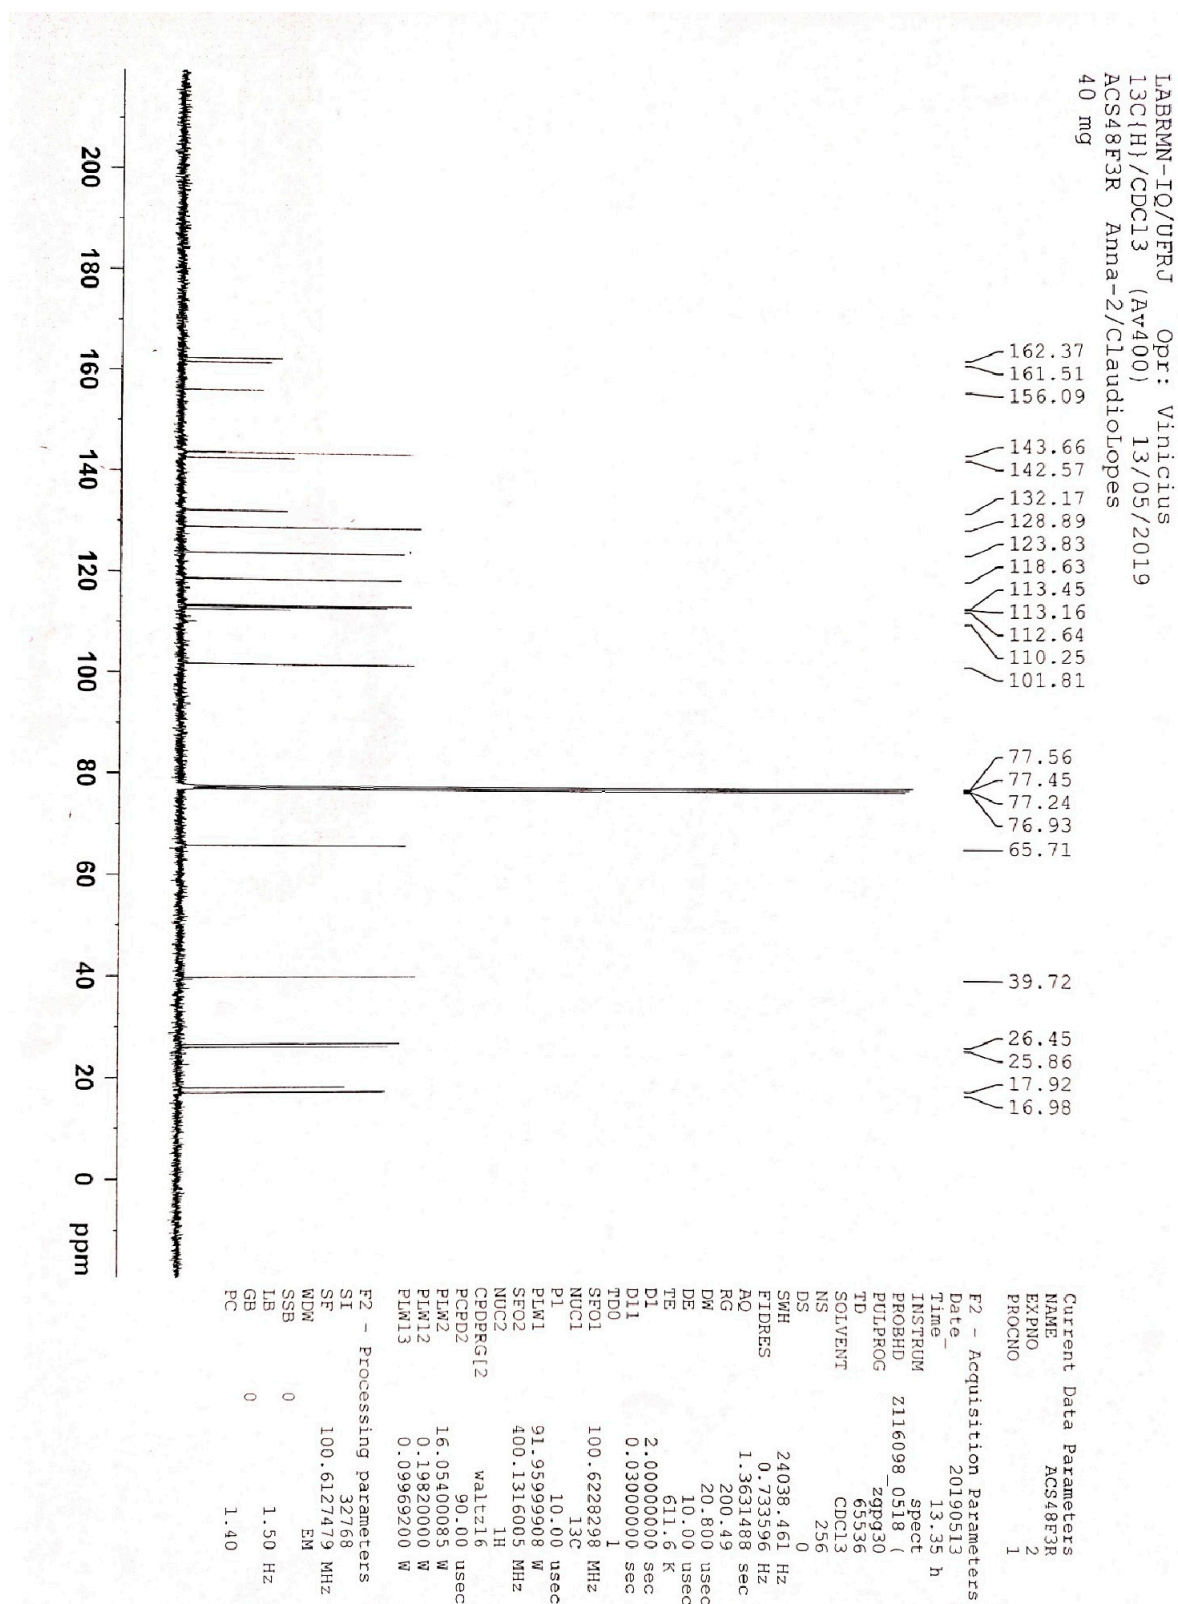

Figure S7.  $^1\text{H}$  NMR spectra of ACS47.

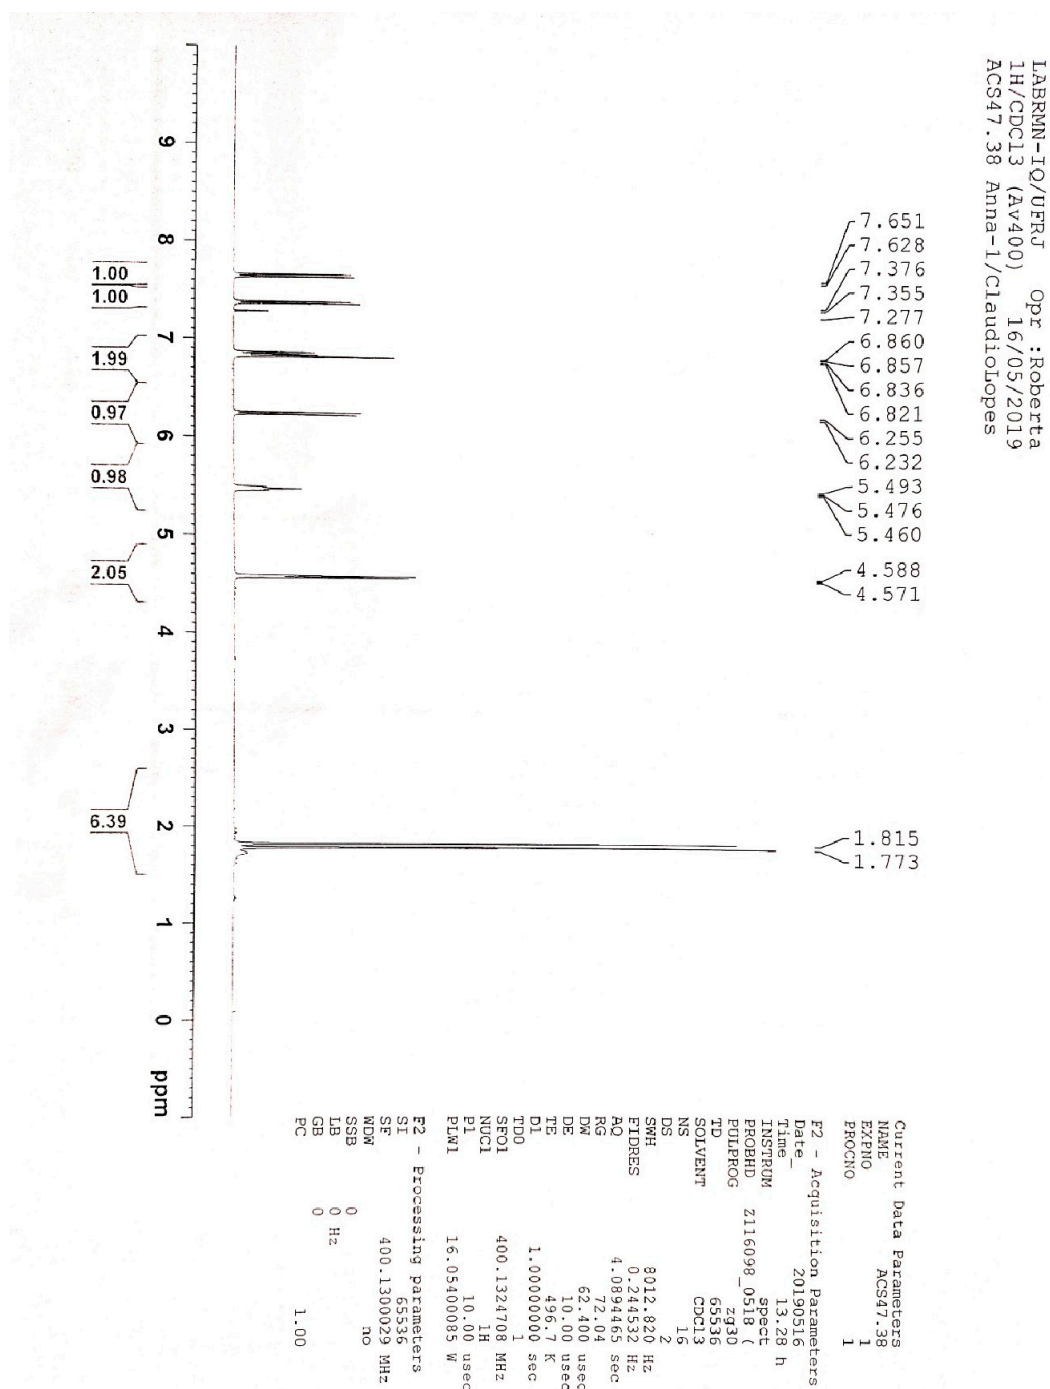



Figure S8.  $^{13}\text{C}$  NMR spectra of ACS47.

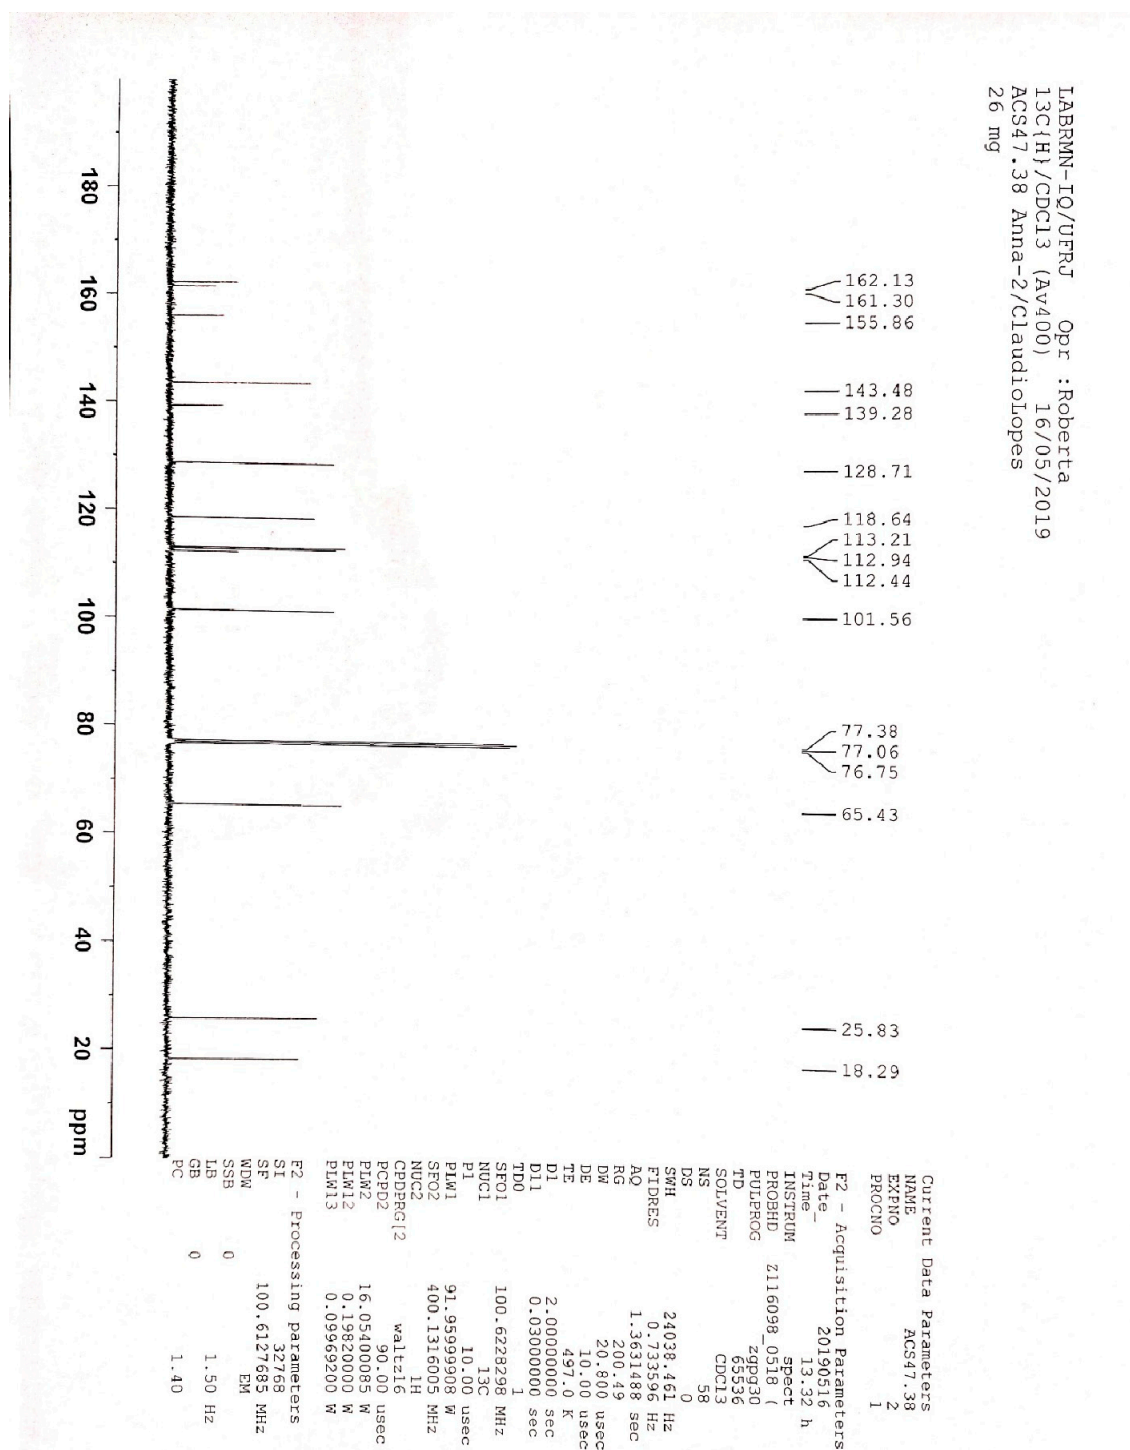

Figure S9.  $^1\text{H}$  NMR spectra of ACS52.

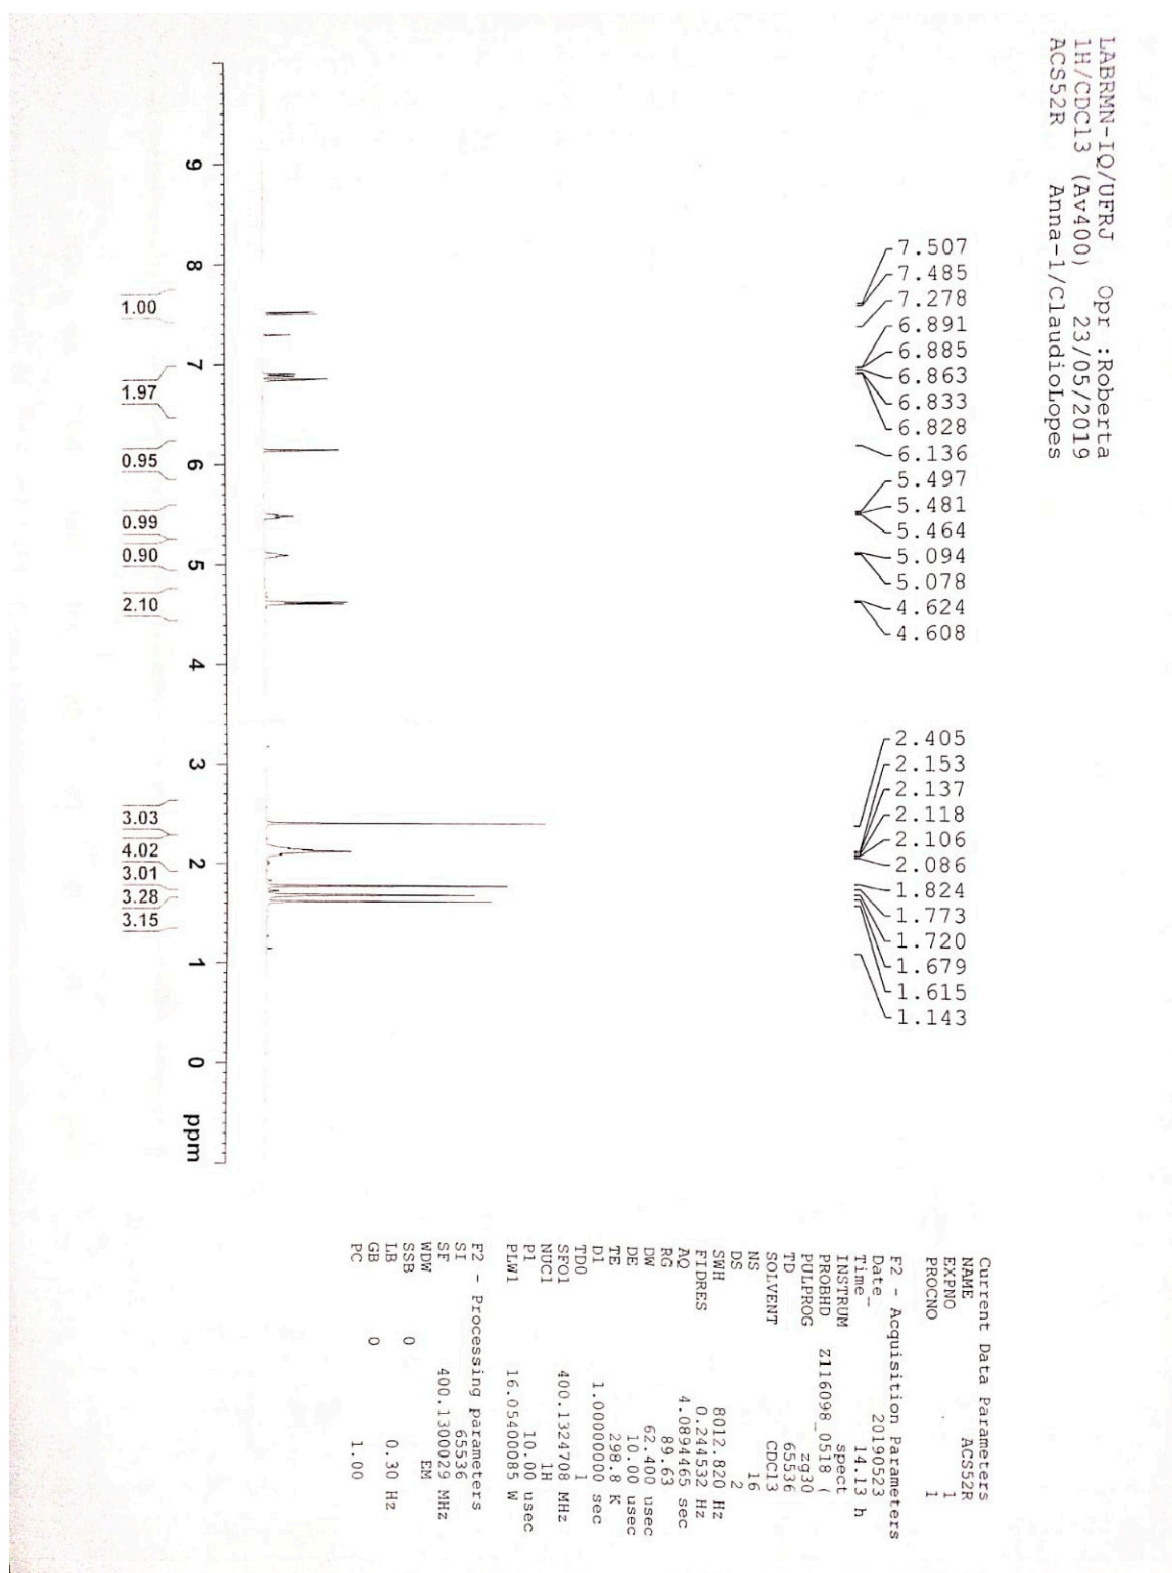

Figure S10.  $^{13}\text{C}$  NMR spectra of ACS52.

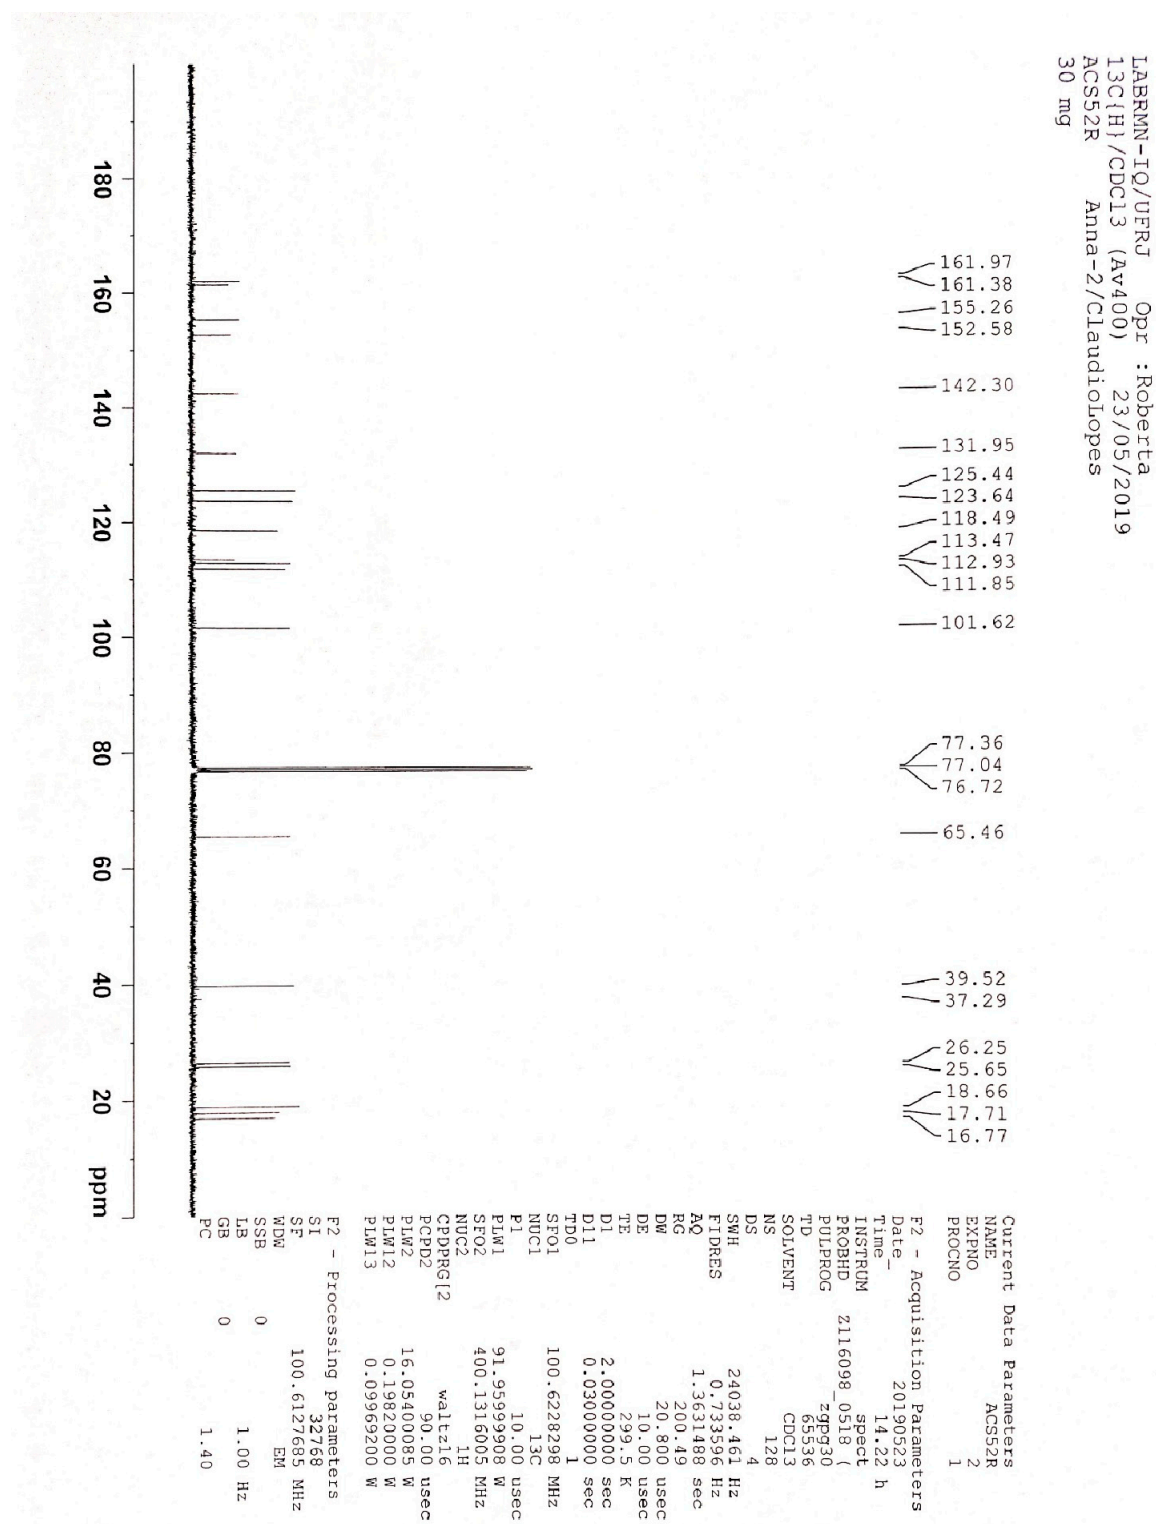

Figure S11.  $^1\text{H}$  NMR spectra of ACS54.

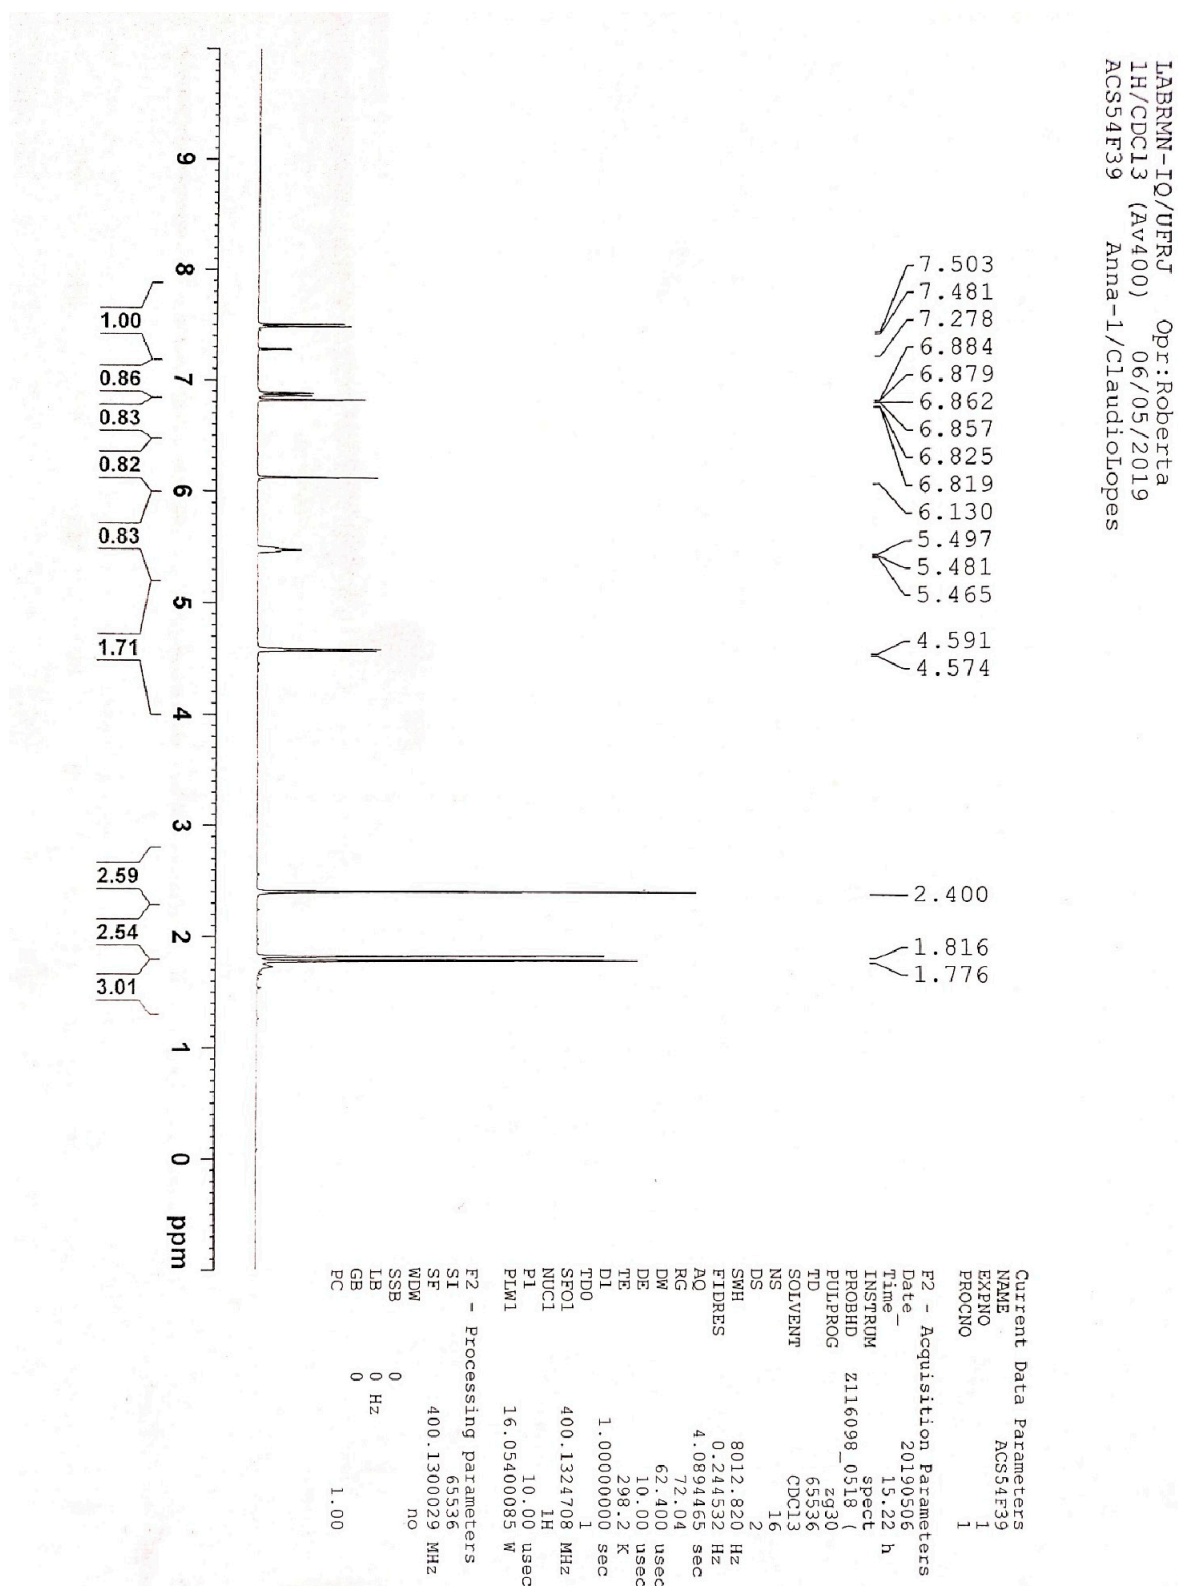

Figure S12.  $^{13}\text{C}$  NMR spectra of ACS54.

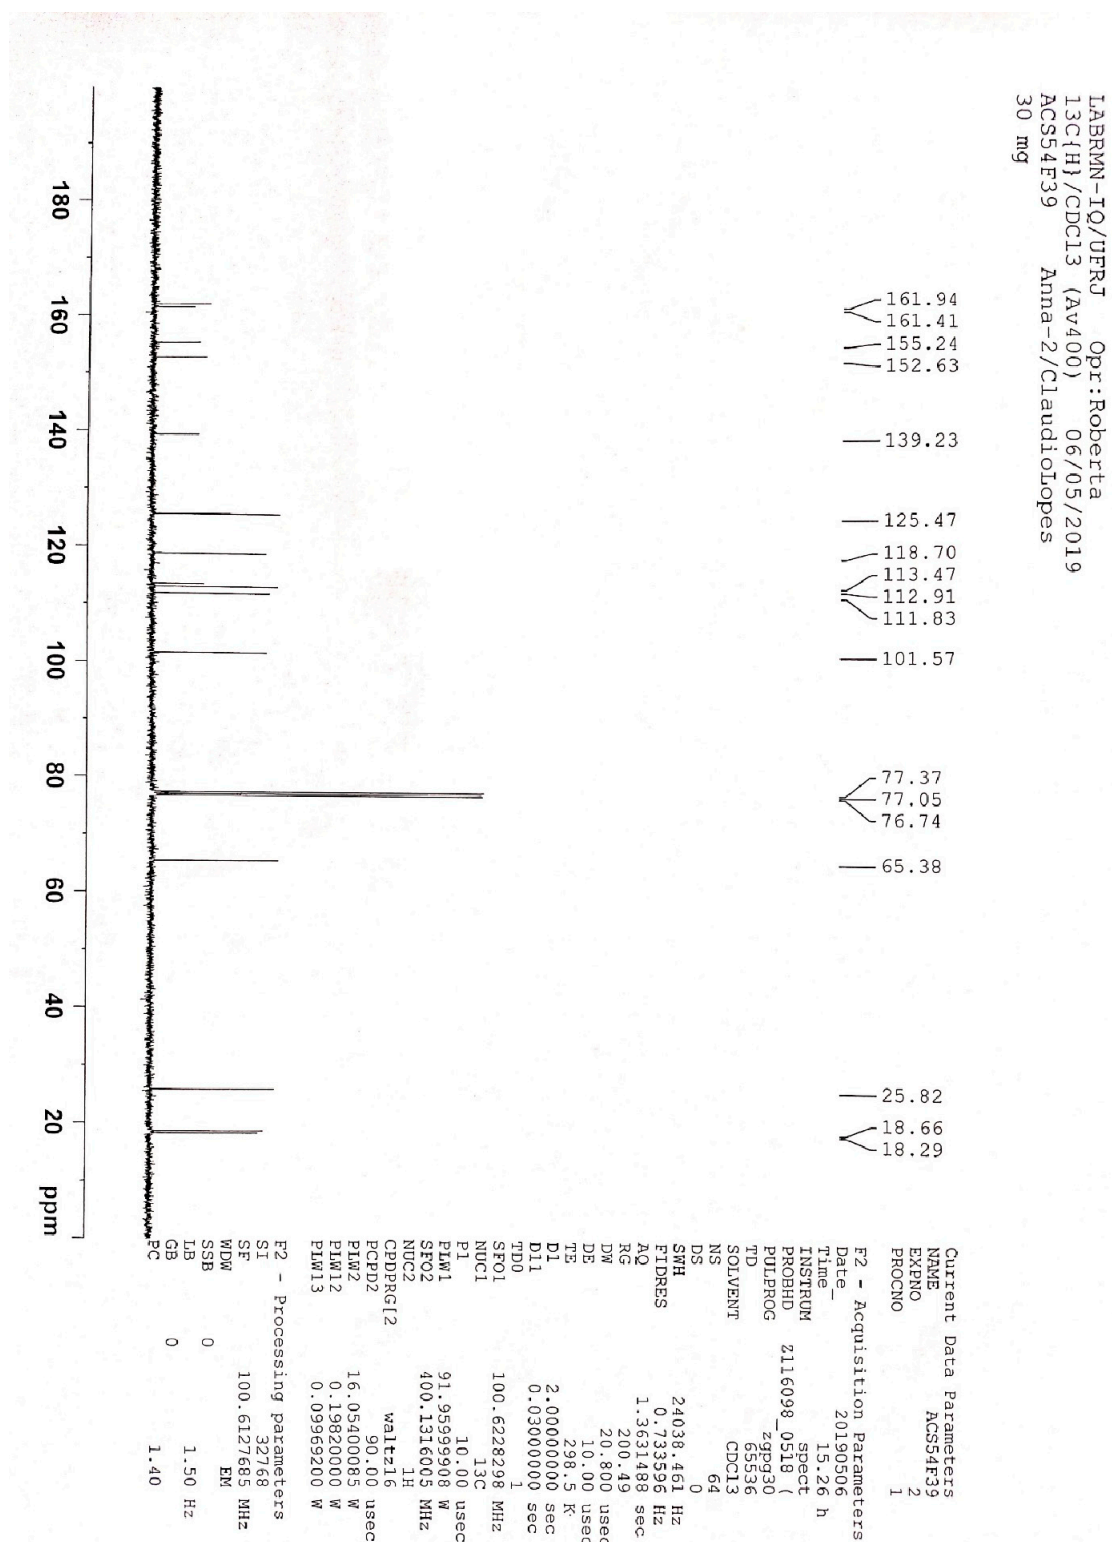



|                        |                                      |                        |                |              |                                          |                      |                  |                 |
|------------------------|--------------------------------------|------------------------|----------------|--------------|------------------------------------------|----------------------|------------------|-----------------|
| Acquisition Time (sec) | 1.6384                               | Comment                | LABRMV-IQ/UFRL | Opt: Roberta | <sup>1</sup> H/CDCl <sub>3</sub> (AV500) | 04/10/2019           | ACSS6R           | Arma-I/ClaudioL |
| Date                   | 04 Oct 2019 10:58:24                 |                        |                |              |                                          | 04 Oct 2019 10:58:24 |                  |                 |
| File Name              | C:\USERS\LASAPE\DESKTOP\ACSS6R\1\FID |                        |                |              |                                          |                      |                  |                 |
| Number of Transients   | 16                                   | Origin                 | spect          |              | Frequency (MHz)                          | 500.13               | Nucleus          | <sup>1</sup> H  |
| Points Count           | 16384                                | Pulse Sequence         | zg30           |              | Original Points Count                    | 16384                | Owner            | nmrsu           |
| Solvent                | CHLOROFORM-d                         |                        |                |              | Receiver Gain                            | 144.00               | SW (cycles) (Hz) | 10000.00        |
| Sweep Width (Hz)       | 9999.39                              | Temperature (degree C) | 28.160         |              | Spectrum Offset (Hz)                     | 3981.6399            | Spectrum Type    | STANDARD        |

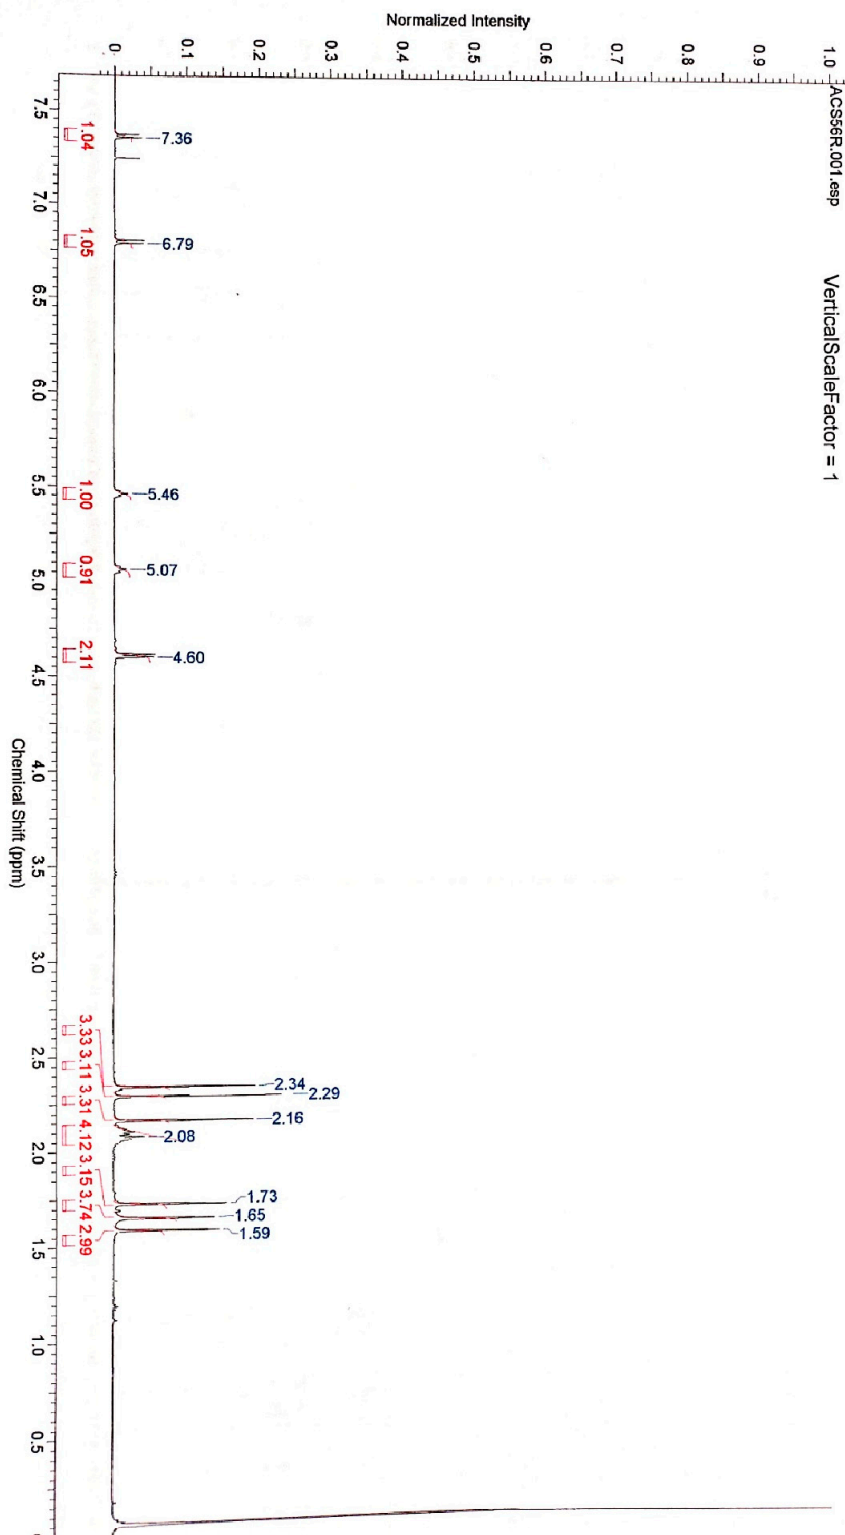

Figure S13. <sup>1</sup>H NMR spectra of ACS56.

Figure S14.  $^{13}\text{C}$  NMR spectra of ACS56.

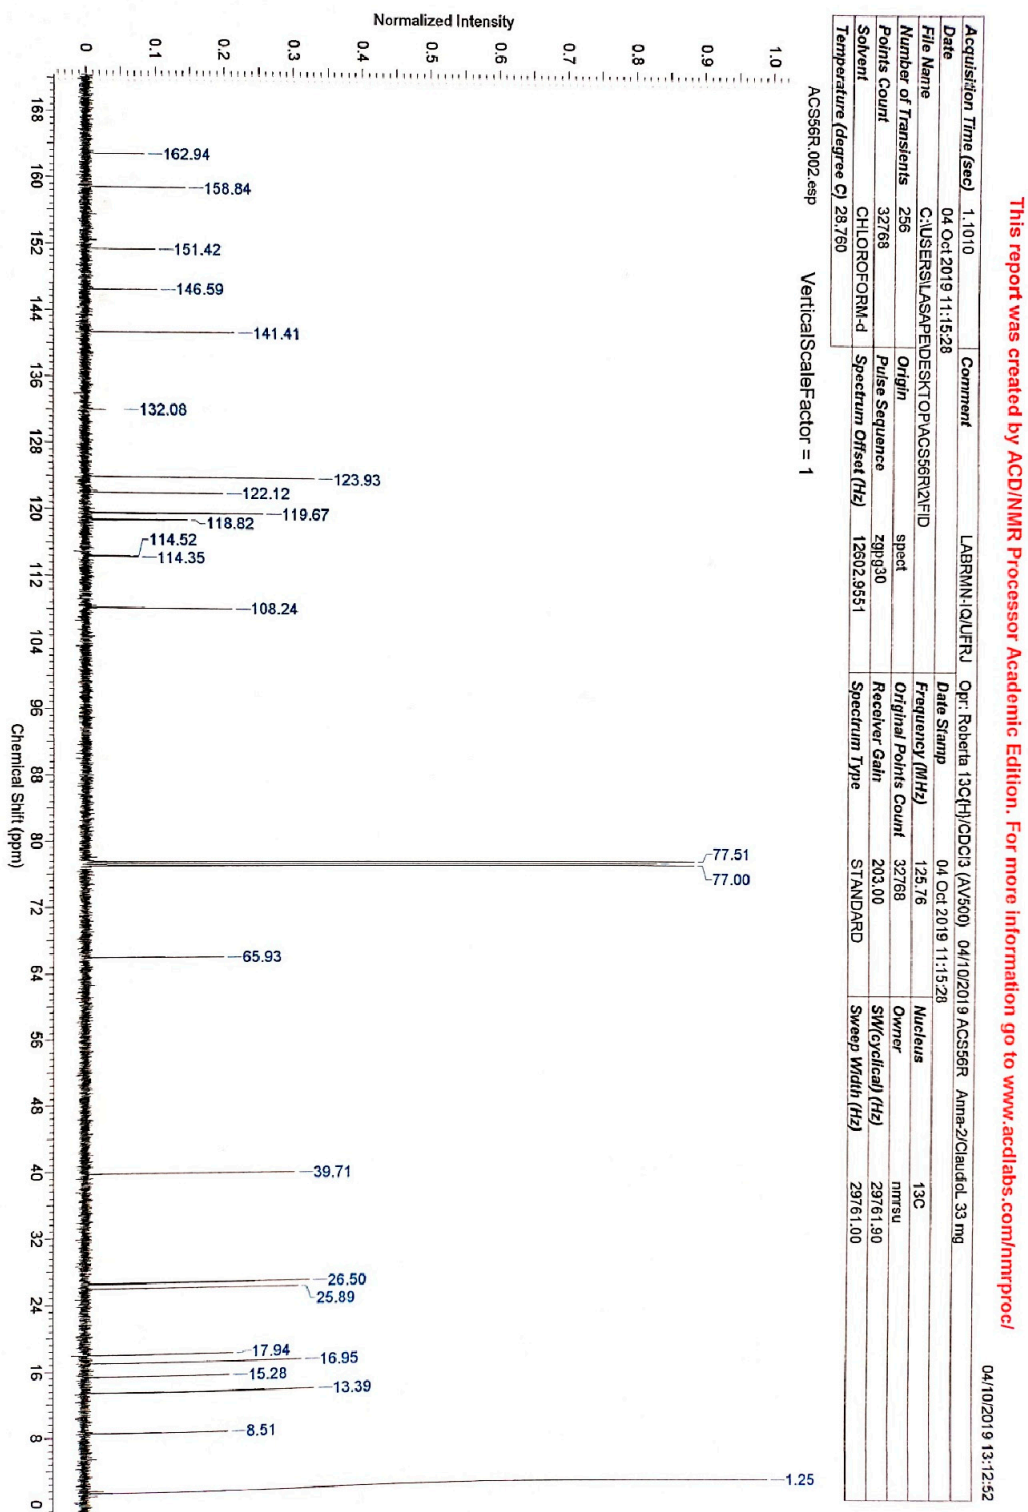

Figure S15.  $^1\text{H}$  NMR spectra of ACS55.

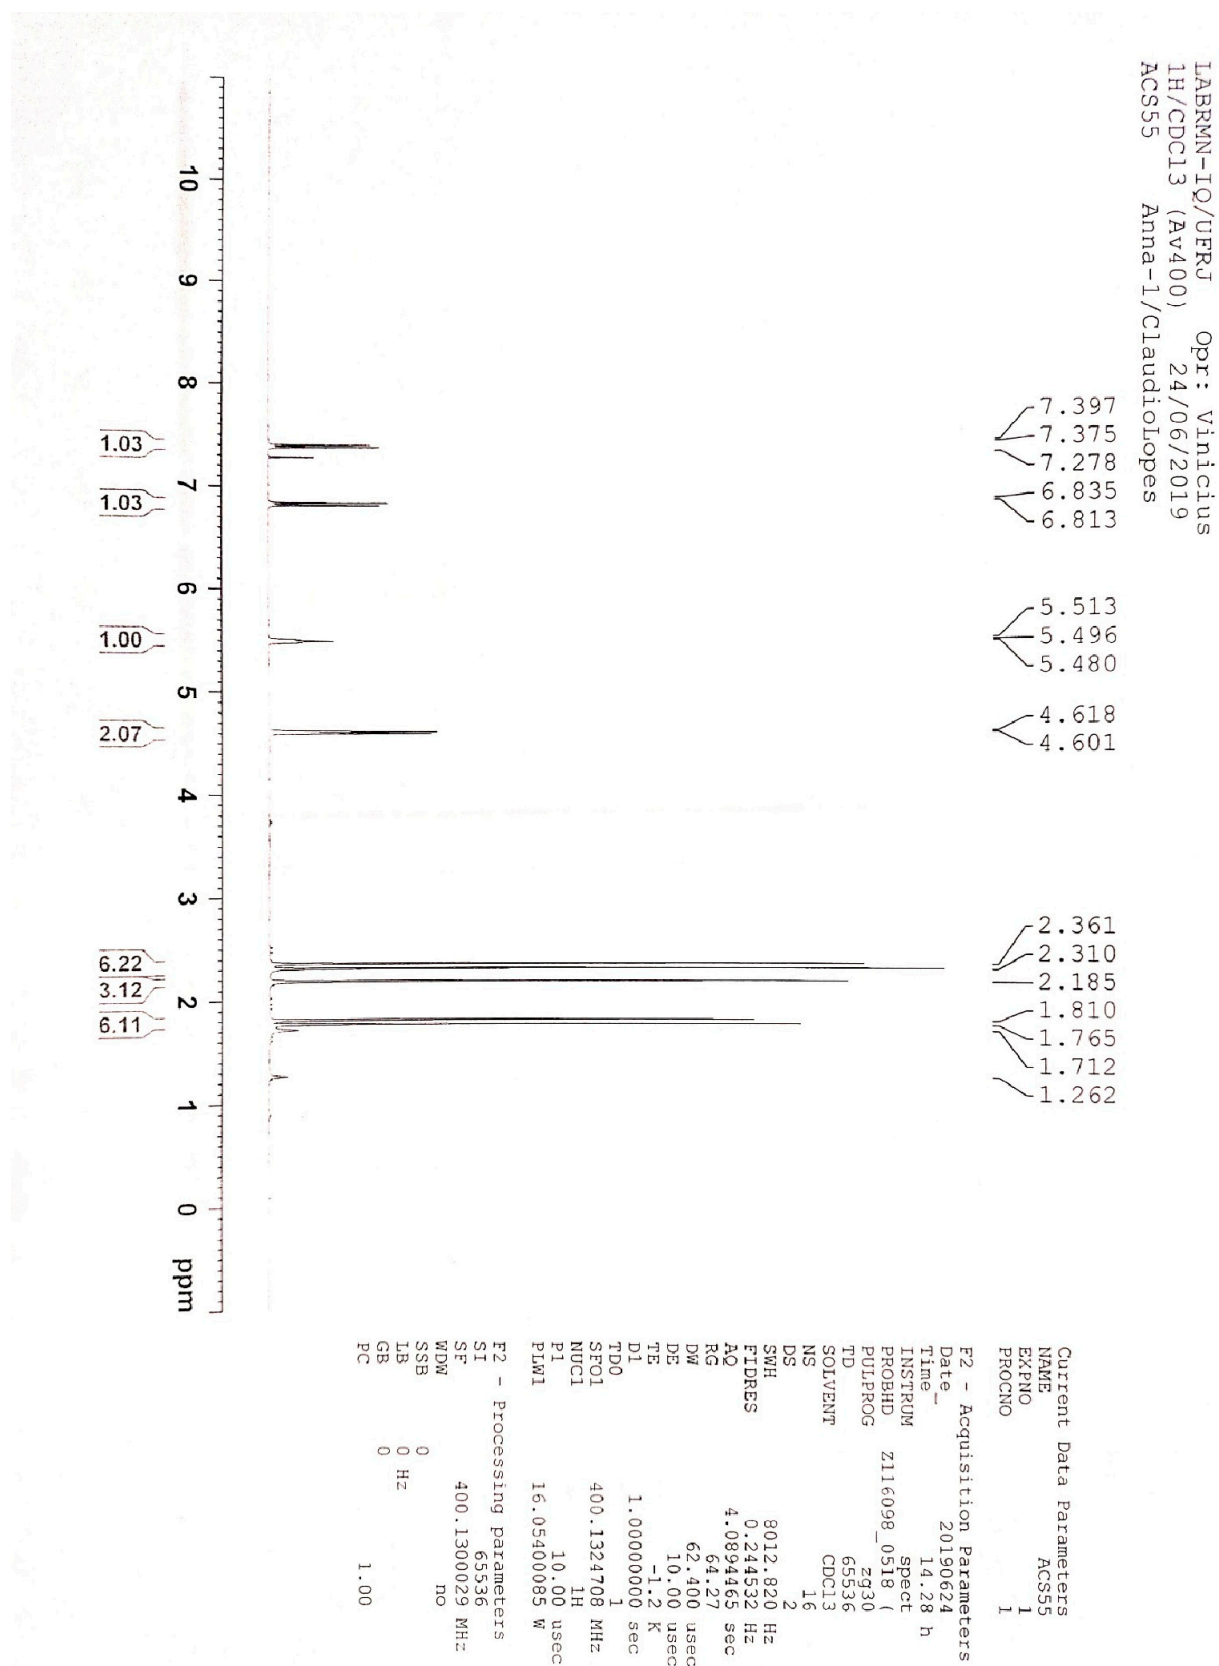

LABRMN-1Q/UFRJ      Opr: Vinicius  
13C{H}/CDCl3 (Av400)      24/06/2019  
ACS55      Anna-2/ClaudioLopes  
30 mg

Chemical shift (ppm): 200, 180, 160, 140, 120, 100, 80, 60, 40, 20, 0 ppm

Peak list (ppm): 162.67, 158.60, 151.18, 146.35, 138.02, 121.92, 119.58, 118.58, 114.29, 114.08, 107.95, 77.37, 77.05, 76.73, 65.64, 25.78, 18.30, 15.05, 13.15, 8.28

| Current Data Parameters    |       | F2 - Acquisition Parameters |                 |
|----------------------------|-------|-----------------------------|-----------------|
| NAME                       | ACS55 | Date_                       | 20190624        |
| EXPNO                      | 2     | Time_                       | 14.36 h         |
| PROCNO                     | 1     | INSTRUM                     | spect           |
|                            |       | PROBHD                      | z116098_0518 (  |
|                            |       | PULPROG                     | _zgpg30         |
|                            |       | TD                          | 65536           |
|                            |       | SOLVENT                     | CDCl3           |
|                            |       | NS                          | 128             |
|                            |       | DS                          | 4               |
|                            |       | SWH                         | 24038.461 Hz    |
|                            |       | FIDRES                      | 0.73596 Hz      |
|                            |       | AQ                          | 1.3631488 sec   |
|                            |       | RG                          | 200.49          |
|                            |       | DW                          | 20.800 usec     |
|                            |       | DE                          | 10.00 usec      |
|                            |       | TE                          | -1.2 K          |
|                            |       | D1                          | 2.00000000 sec  |
|                            |       | TD0                         | 0.03000000 sec  |
|                            |       | SFO1                        | 1               |
|                            |       | NUC1                        | 100.6228298 MHz |
|                            |       | P1                          | 13C             |
|                            |       | PL1                         | 10.00 usec      |
|                            |       | SFO2                        | 91.95999908 MHz |
|                            |       | NUC2                        | 1H              |
|                            |       | CPDPRG2                     | waltz16         |
|                            |       | PCPD2                       | 90.00 usec      |
|                            |       | PLW2                        | 16.05400085 W   |
|                            |       | PLW12                       | 0.19820000 W    |
|                            |       | PLW13                       | 0.09969200 W    |
| F2 - Processing parameters |       |                             |                 |
| SI                         |       |                             | 32768           |
| SF                         |       |                             | 100.6127685 MHz |
| MDW                        |       |                             | EM              |
| SSB                        | 0     |                             |                 |
| LB                         |       |                             | 1.00 Hz         |
| GB                         | 0     |                             |                 |
| EC                         |       |                             | 1.40            |
